# Supplementary material
Source: publisher site journal article supplement (https://www.spandidos-publications.com/2828/downloadSupplementary)

Figure S1. (A) Quantitative analysis of p-AKT/AKT in cells. (B) Quantitative analysis of p-mTOR/mTOR in cells. \*P<0.05, \*\*P<0.01, vs. respective control. TGIF1, TGFB induced factor homeobox 1; mTOR, mammalian target of rapamycin.

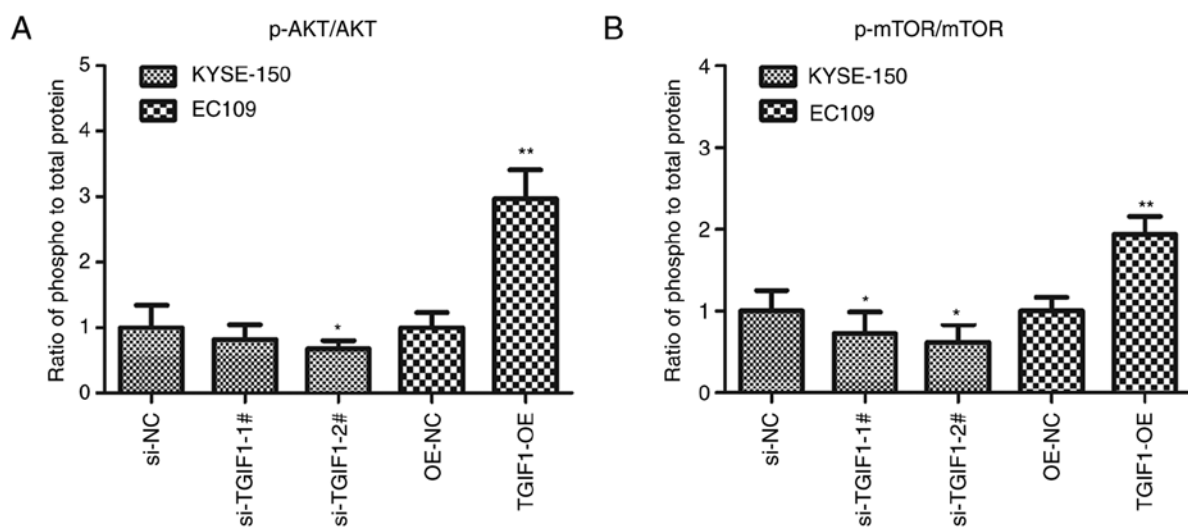

Figure S2. (A) Quantitative analysis of immunohistochemistry results in KYSE-150 cells. (B) Quantitative analysis of immunohistochemistry results in Eca-109 cells. \* $P < 0.05$ , \*\* $P < 0.01$ , vs. respective control. TGFB induced factor homeobox 1.

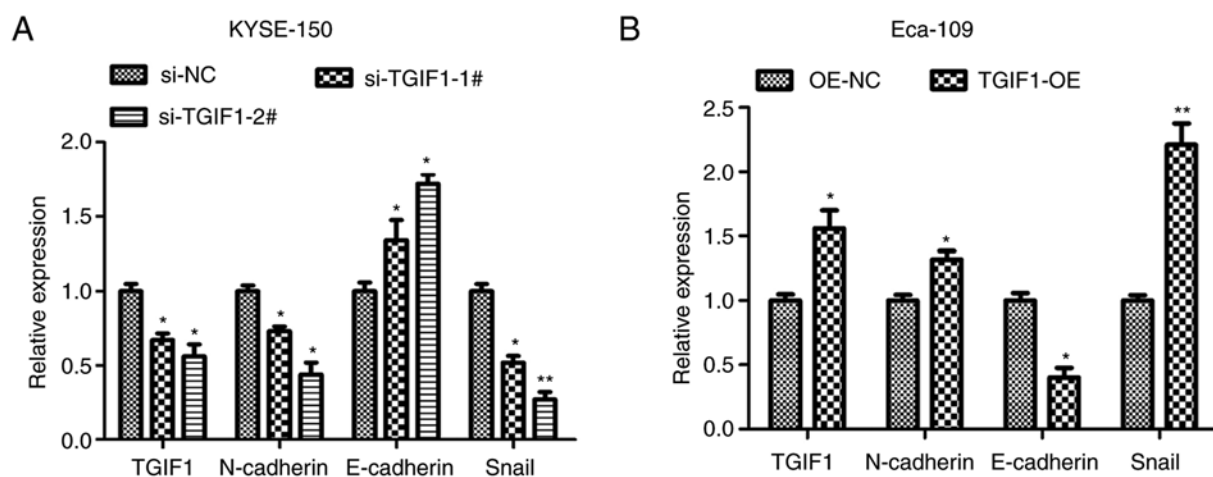

Figure S3. (A) Quantitative analysis of immunohistochemistry results in KYSE-150 cells. (B) Quantitative analysis of immunohistochemistry results in Eca-109 cells. \* $P < 0.05$ , vs. respective control. TGFB induced factor homeobox 1; mTOR, mammalian target of rapamycin.

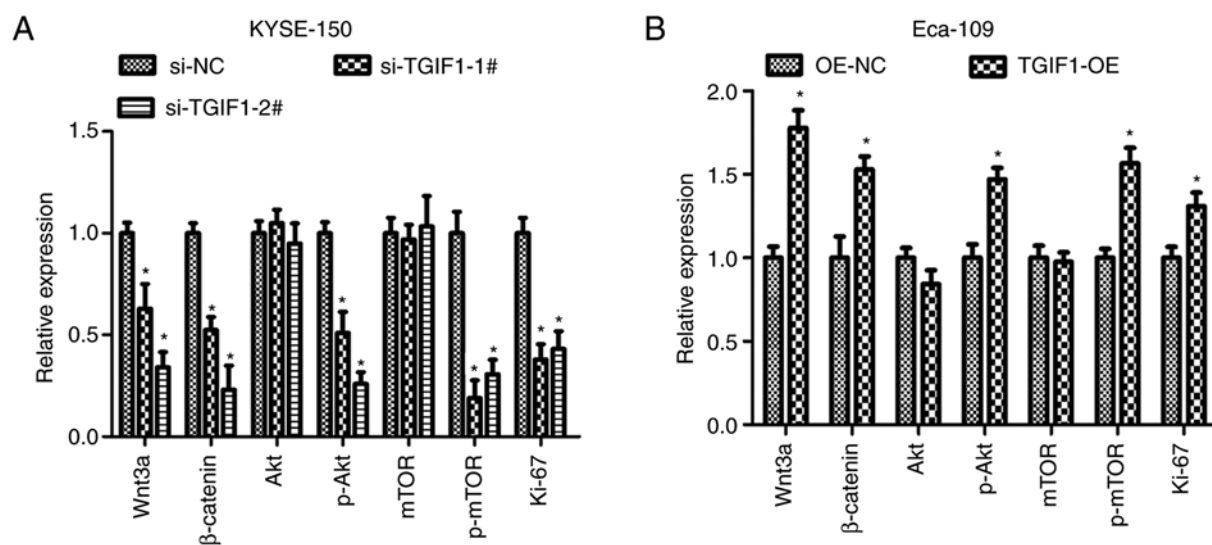

Supplement: Supplementary file 1 [file downloadSupplementary]
